# Supplementary material
Source: PubMed Central journal article supplement (PMC2775824)
Supplement: mmc1.pdf [file mmc1.pdf]

**Supplemental Data****Spinocerebellar Ataxia Type 31 Is Associated  
with “Inserted” Penta-Nucleotide Repeats  
Containing (TGGAA)<sub>n</sub>**

Nozomu Sato, Takeshi Amino, Kazuhiro Kobayashi, Shuichi Asakawa, Taro Ishiguro, Taiji Tsunemi,  
Makoto Takahashi, Tohru Matsuura, Kevin M. Flanigan, Sawa Iwasaki, Fumitoshi Ishino, Yuko Saito,  
Shigeo Murayama, Mari Yoshida, Yoshio Hashizume, Yuji Takahashi, Shoji Tsuji,  
Nobuyoshi Shimizu,  
Tatsushi Toda, Kinya Ishikawa, and Hidehiro Mizusawa

**Table S1. Primers for RT-PCR analyses.**

|                                                   | Forward Primer (5'>3')                          | Reverse Primer (5'>3')  |
|---------------------------------------------------|-------------------------------------------------|-------------------------|
| <b>BEAN-EXT</b>                                   |                                                 |                         |
| Transcript 1                                      | CACCCTTGGACATCAGCTCT                            | TGTGGGTCCTAGCGAGTTTC    |
| Transcript 2                                      | TGCCACTCTGAGCCTCATT                             | TGTGGGTCCTAGCGAGTTTC    |
| <b>TK2-EXT</b>                                    |                                                 |                         |
| Transcript 3                                      | TGCAGGGAAGAGGAGAAGGT                            | TTTCACGGAACGTGGAGCTCTC  |
| <b>BEAN &amp; FLJ27243 strand-specific RT-PCR</b> |                                                 |                         |
| S for BEAN-strand                                 | S: CGCCATCGTGATAGTCCACA                         |                         |
| AS for FLJ27243-strand                            | AS: GGGCCCCAGTGTGTGTATGT<br>ATGTTCTCGTGGTGGCTGT | TGTGGTGAGGTCCCAGGTCT    |
| <b>RT-PCR in TK2 across intron 6</b>              |                                                 |                         |
| RT-PCR 1                                          | TGTCATCTGTACGGTTGATGGAG                         | CAACAGACACGTCCATGTTCTT  |
| RT-PCR 2                                          | TGTCATCTGTACGGTTGATGGAG                         | TGGAGATGGTGAATTGCTTCCAG |

**Table S2. TaqMan quantitative RT-PCR probes and primers**

|          | Forward primers (5'>3') | Reverse primers (5'>3')  | Probes (5'>3')                 |
|----------|-------------------------|--------------------------|--------------------------------|
| <b>A</b> | AAGCTGGAGCCGGCACT       | GATGGCTGTGCTCCGAGC       | CTGCAGCCAAGCCGATAGCACGA        |
| <b>B</b> | TGCTCCAAGGATTACATGTCCTT | GTAGAAGTAGCTGGTGGGTTGT   | AAACGTCCCTGCCCCCTTAGCACGA      |
| <b>C</b> | ACGTGGATGCCACGGTG       | CCCACACACTCCTCGTAGCC     | CAGGGAGCTGTACCCAGATTCTCCACC    |
| <b>D</b> | ACGGTGCTCAGGGAGCTGT     | AGGATGGCGTCCAGTTTGTG     | CTCCACCAGGATGTACTACTGGGAGCT    |
| <b>E</b> | GCCACTCTGAGCCTCATTATCC  | CTCCCAGTGACATCTGCCATA    | TCCTTGTGAGGCATGGCTGGATCC       |
| <b>F</b> | TGCCCTTCTCACTTAGAGCTTGT | TTACTGTCTCTCCACCGTCCAT   | CTCAGCTGTTCTATCCATGCCCACC      |
| <b>G</b> | CCAGTGGCTCTCCAGTCCTCTA  | AGGAAAATGTCCTTGGGAAACC   | TCCTGCCTTGCTTCAGTGACCCTGTC     |
| <b>H</b> | TGATCTGTGTCGAGGGCAATAT  | TCTGTCGCGTTGGAGAAGAA     | CAAGTGGGAAGACGACATGCCTGGA      |
| <b>I</b> | CTTCGGACCAATCCTGAGACTT  | GATGGTGAATTGCTTCCAGGTAT  | AGAAGAGATGCAGGGAAGAGGAGAAGGTCA |
| <b>J</b> | TGAGGATGTGGGTGAGAGTTTG  | CTCACTGGCTTCCTTGCCCTT    | CAGGAGTACCAGATGGAGTGAGGCAGGA   |
| <b>K</b> | GGATCCTGAACACGCCAAAC    | GGTGATGATGAAACAAGCTAATGC | TCATCCGAGGCACCTTCAGGGAAC       |
| <b>L</b> | TTCATCCTGTGGCCCAATTC    | GATTCATGGATCGCCGACTT     | CCTCTTCAACGACCTGATTGCTTGTGC    |

A-G: primers and probes for *BEAN* or *BEAN-EXT*; H-I for *TK2*; J for *FLJ27243*; K-L for *CKLF*.

**Table S3. Oligonucleotide probes for fluorescence in situ hybridization.**

| Probe Names                 | Sequences (5'>3')            | Target Repeats            | Melting Temperatures |
|-----------------------------|------------------------------|---------------------------|----------------------|
| (TTTTATTCTA) <sub>2.5</sub> | TATTTTATTCTATTTTATTCTATTT    | (UAAAAUAGAA) <sub>n</sub> | 65 °C                |
| (TAGAATAAAA) <sub>2.5</sub> | AAAATAGAATAAAAATAGAATAAAAATA | (UUUUAUUCUA) <sub>n</sub> | 57 °C                |

**Table S4. Primers designed to synthesize recombinant serine/arginine-rich splicing factors.**

| <b>Primer Names</b> | <b>Sequences (5'&gt;3')</b>           |
|---------------------|---------------------------------------|
| SFRS1-F             | AGCAGAATTCATGTCGGGAGGTGGTGTGATTCGTGG  |
| SFRS1-1-R           | TGCTGTCGACTTATGTACGAGAGCGAGATCTGCTATG |
| SFRS1-2-R           | TGCTGTCGACTTAAGACCACTGTATCCAATTCTGGT  |
| SFRS9-F             | AGCAGAATTCATGTCGGGCTGGGCGGACGAGCGCG   |
| SFRS9-R             | TGCTGTCGACTCAGTAGGGCCTGAAAGGAGAGAAGT  |
